# Supplementary material for: Corticosteroid Treatment During Sepsis Alters Hippocampal Function in Male and Female Survivors
Source: PubMed Central journal article supplement — Biol Psychiatry Glob Open Sci. 2023 Aug 9;4(1):336–45. doi: 10.1016/j.bpsgos.2023.08.001 (PMC10829652; doi:10.1016/j.bpsgos.2023.08.001), 2023-08-09
Supplement: mmc1.pdf [file mmc1.pdf]

## SUPPLEMENTARY INFORMATION

# Corticosteroid Treatment During Sepsis Alters Hippocampal Function in Male and Female Survivors

Hill *et al.*

Figure 7A Pathways

- Upper pathway group in Figure 7A

leukocyte cell-cell adhesion  
T cell activation  
regulation of cell activation  
positive regulation of cell adhesion  
regulation of leukocyte activation  
response to bacterium  
regulation of cell-cell adhesion  
positive regulation of cell-cell adhesion  
leukocyte differentiation  
mononuclear cell differentiation  
regulation of leukocyte cell-cell adhesion  
mononuclear cell proliferation  
regulation of lymphocyte activation  
positive regulation of leukocyte cell-cell adhesion  
antigen processing and presentation  
lymphocyte proliferation  
leukocyte proliferation  
lymphocyte differentiation  
leukocyte activation involved in immune response

- Lower pathway group in Figure 7A

adaptive immune response  
regulation of immune response  
leukocyte mediated immunity  
positive regulation of immune response  
innate immune response  
adaptive immune response based on somatic recombination of  
immune receptors built from immunoglobulin superfamily  
domains  
lymphocyte mediated immunity

## Figure 7B Pathways

- **Development and differentiation**

- embryonic organ development
- limb development
- epithelial cell development
- muscle tissue development
- tube formation
- skeletal system morphogenesis
- regulation of neuron differentiation
- muscle organ development
- Appendage development
- Epithelial tube morphogenesis
- Peripheral nervous system development
- visual system development
- striated muscle tissue development
- epithelial cell differentiation

- **Hormone and cellular signaling**

- cellular response to lipid
- carbohydrate derivative biosynthetic process
- hormone-mediated signaling pathway
- steroid hormone mediated signaling pathway
- intracellular steroid hormone receptor signaling pathway
- negative regulation of protein serine/threonine kinase activity
- cellular response to hormone stimulus
- multicellular organismal homeostasis

- **Regulation of gene expression**

- regulation of mRNA metabolic process
- mRNA processing
- regulation of mRNA catabolic process
- Nucleobase-containing small molecule metabolic processes
- covalent chromatin modification
- Histone modification
- Proteasomal ubiquitin-independent catabolic processes
- RNA splicing
